# Supplementary material
Source: publisher figshare collection journal article supplement (https://acs.figshare.com/ndownloader/files/8975092)
Supplement: Supplementary file 1 [file 8975092]

## SUPPORTING INFORMATION

### The Long And The Short of It: Regiospecific Syntheses of Isomers of Dicarbomethoxydibenzo-27-Crown-9 and Binding Abilities of Their Pyridyl Cryptands

Adam M.-P. Pederson,<sup>§</sup> Terry L. Price, Jr., Carla Slebodnick,  
Daniel V. Schoonover and Harry W. Gibson \*

Department of Chemistry  
Virginia Tech  
Blacksburg, VA 24060

| Topic                                                                                                               | Page |
|---------------------------------------------------------------------------------------------------------------------|------|
| Figure S1. <sup>1</sup> H NMR spectrum of <i>cis</i> (4,4')-di(carbomethoxy)dibenzo-27-crown-9-short ( <b>6</b> ).  | S3   |
| Figure S2. COSY NMR spectrum of <i>cis</i> (4,4')-di(carbomethoxy)dibenzo-27-crown-9-short ( <b>6</b> ).            | S4   |
| Figure S3. <sup>13</sup> C NMR spectrum of <i>cis</i> (4,4')-di(carbomethoxy)dibenzo-27-crown-9-short ( <b>6</b> ). | S5   |
| Figure S4. <sup>1</sup> H NMR spectrum of <i>cis</i> -bis(hydroxymethyl)dibenzo-27-crown-9-short ( <b>7</b> ).      | S6   |
| Figure S5. COSY NMR spectrum of <i>cis</i> -bis(hydroxymethyl)dibenzo-27-crown-9-short ( <b>7</b> ).                | S7   |
| Figure S6. <sup>13</sup> C NMR spectrum of <i>cis</i> -bis(hydroxymethyl)dibenzo-27-crown-9-short ( <b>7</b> ).     | S8   |
| Figure S7. <sup>1</sup> H NMR spectrum of <i>cis</i> -di(carbomethoxy)dibenzo-27-crown-9-long ( <b>9</b> ).         | S9   |
| Figure S8. COSY NMR spectrum of <i>cis</i> -di(carbomethoxy)dibenzo-27-crown-9-long ( <b>9</b> ).                   | S10  |
| Figure S9. <sup>13</sup> C NMR spectrum of <i>cis</i> -di(carbomethoxy)dibenzo-27-crown-9-long ( <b>9</b> ).        | S11  |
| Figure S10. <sup>1</sup> H NMR spectrum of <i>cis</i> -bis(hydroxymethyl)dibenzo-27-crown-9-                        | S12  |

|                                                                                                                                           |     |
|-------------------------------------------------------------------------------------------------------------------------------------------|-----|
| long ( <b>10</b> ).                                                                                                                       |     |
| Figure S11. COSY NMR spectrum of of <i>cis</i> -bis(hydroxymethyl)dibenzo-27-crown-9-long ( <b>10</b> ).                                  | S13 |
| Figure S12. $^{13}\text{C}$ NMR spectrum of <i>cis</i> -bis(hydroxymethyl)dibenzo-27-crown-9-long ( <b>10</b> ).                          | S14 |
| Figure S13. $^{13}\text{C}$ NMR spectrum of <i>cis</i> -dibenzo-27-crown-9-short pyridyl cryptand <b>3</b> .                              | S15 |
| Figure S14. $^{13}\text{C}$ NMR spectrum of <i>cis</i> -dibenzo-27-crown-9-long pyridyl cryptand <b>4</b> .                               | S16 |
| Crystallographic data for the complex <b>3</b> • <b>DQ</b> ( <b>PF</b> <sub>6</sub> ) <sub>2</sub>                                        | S17 |
| Figure S15. Thermal ellipsoid representation of <b>3</b> • <b>DQ</b> ( <b>PF</b> <sub>6</sub> ) <sub>2</sub> at the 90% confidence level. | S19 |
| References                                                                                                                                | S20 |

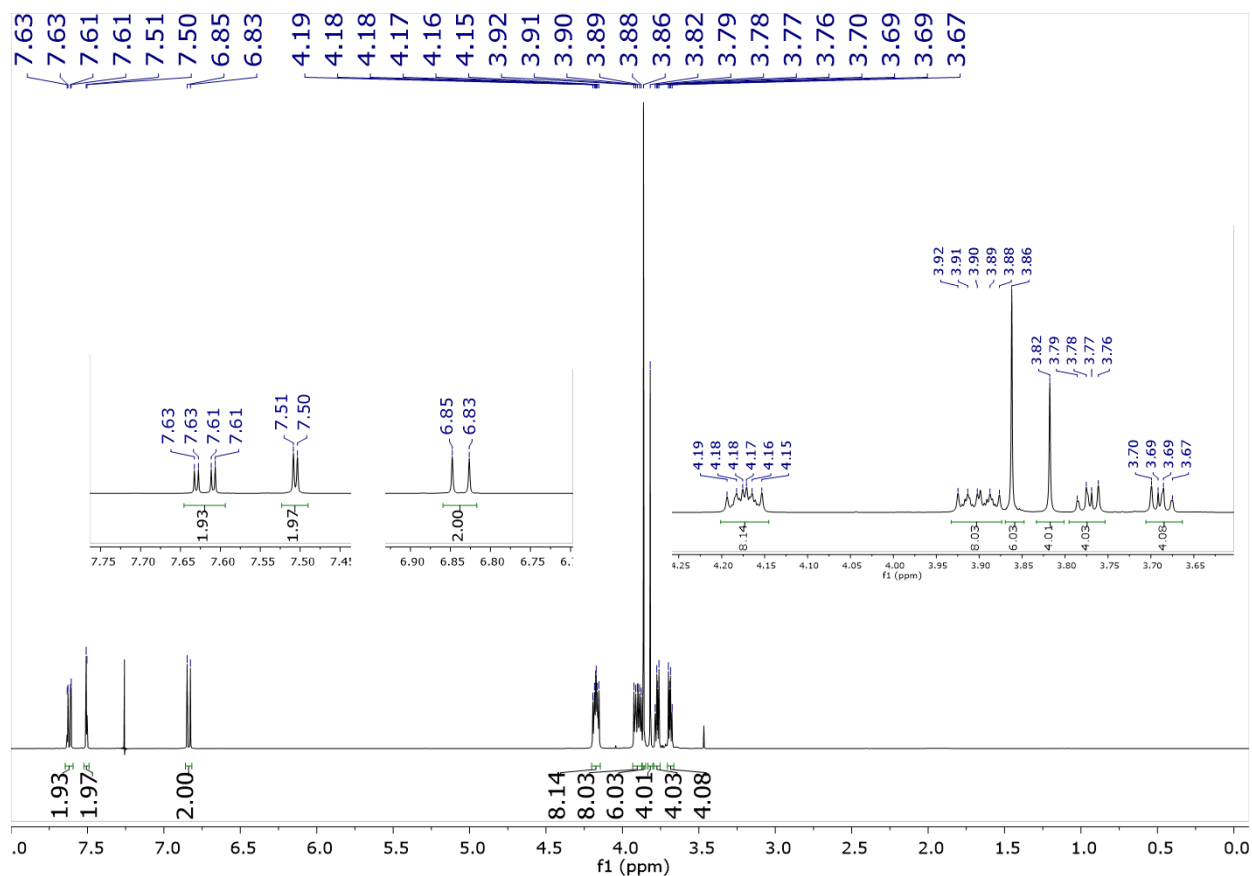

**Figure S1.**  $^1\text{H}$  NMR spectrum (400 MHz,  $\text{CDCl}_3$ , 23  $^\circ\text{C}$ ) of *cis*(4,4')-di(carbomethoxy)dibenzo-27-crown-9-short (**6**):  $\delta$  7.62 (dd,  $J$  = 8, 2 Hz, 2H), 7.51 (d,  $J$  = 2 Hz, 2H), 6.84 (d,  $J$  = 8 Hz, 2H), 4.20 – 4.15 (m, 8H), 3.93 – 3.87 (m, 8H), 3.86 (s, 6H), 3.82 (s, 4H), 3.79 – 3.76 (m, 4H), 3.71 – 3.66 (m, 4H).

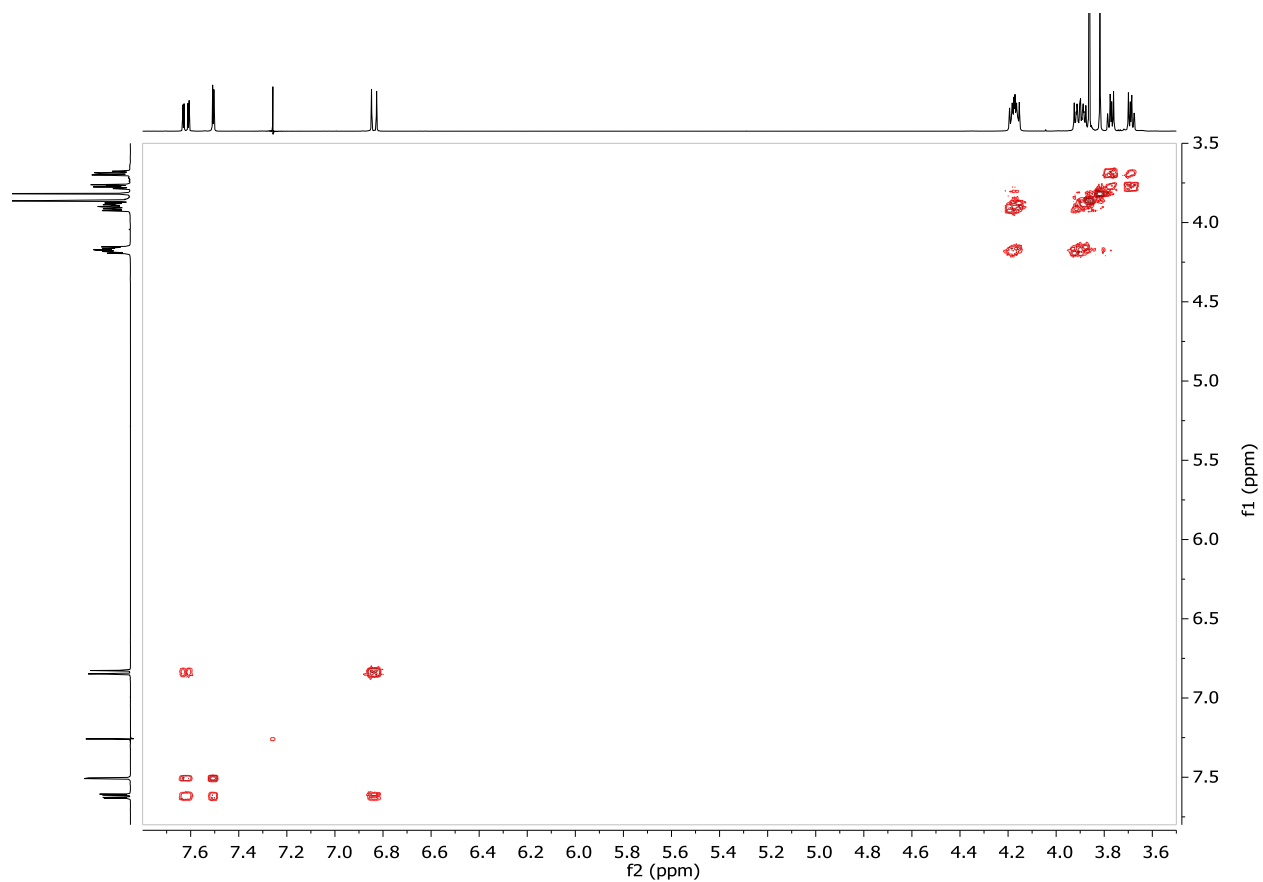

**Figure S2.** COSY NMR spectrum (400 MHz,  $\text{CDCl}_3$ , 23 °C) of *cis*(4,4')-di(carbomethoxy)dibenzo-27-crown-9-short (**6**).

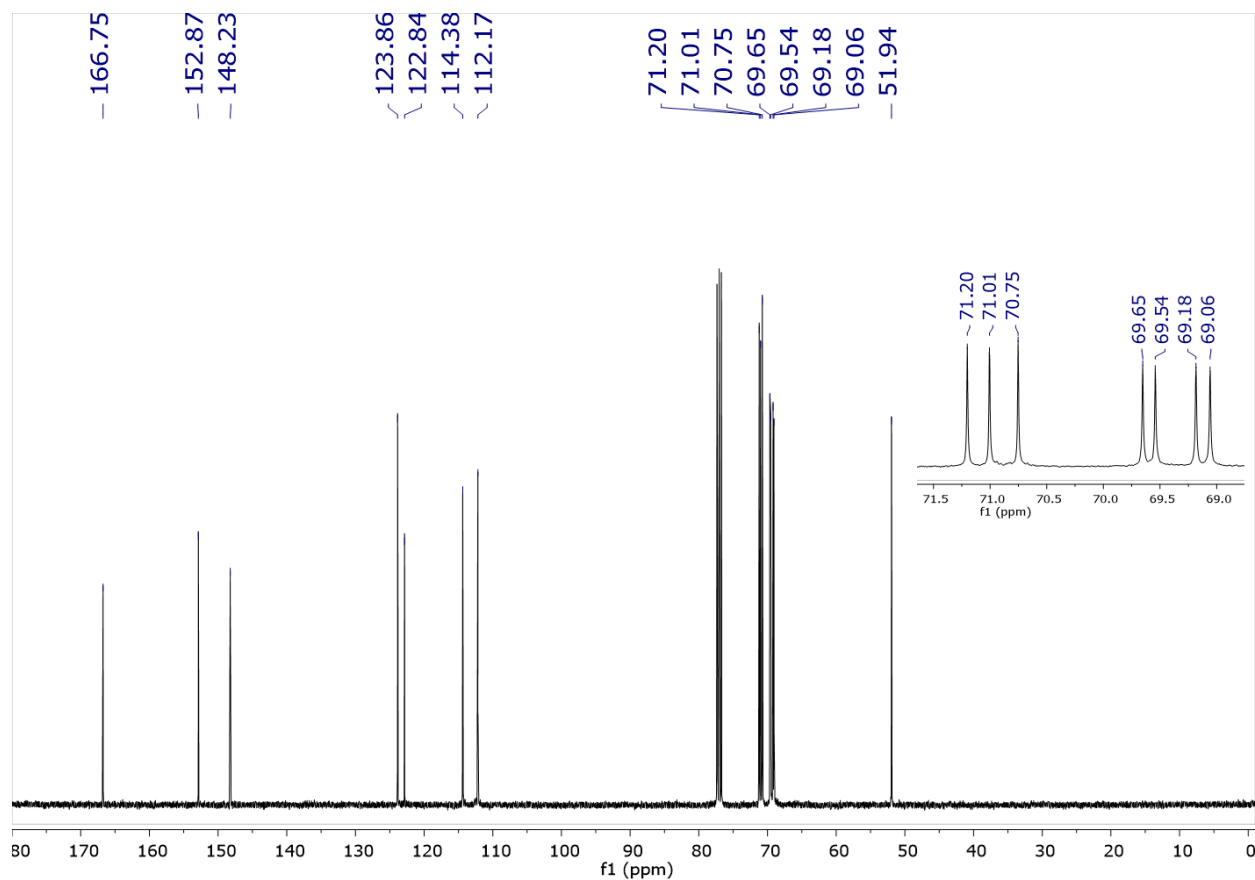

**Figure S3.**  $^{13}\text{C}$  NMR spectrum (101 MHz,  $\text{CDCl}_3$ , 23  $^\circ\text{C}$ ) of *cis*(4,4')-di(carbomethoxy)dibenzo-27-crown-9-short (**6**):  $\delta$  166.75, 152.87, 148.23, 123.86, 122.84, 114.38, 112.17, 71.20, 71.01, 70.75, 69.65, 69.54, 69.18, 69.06, 51.94.

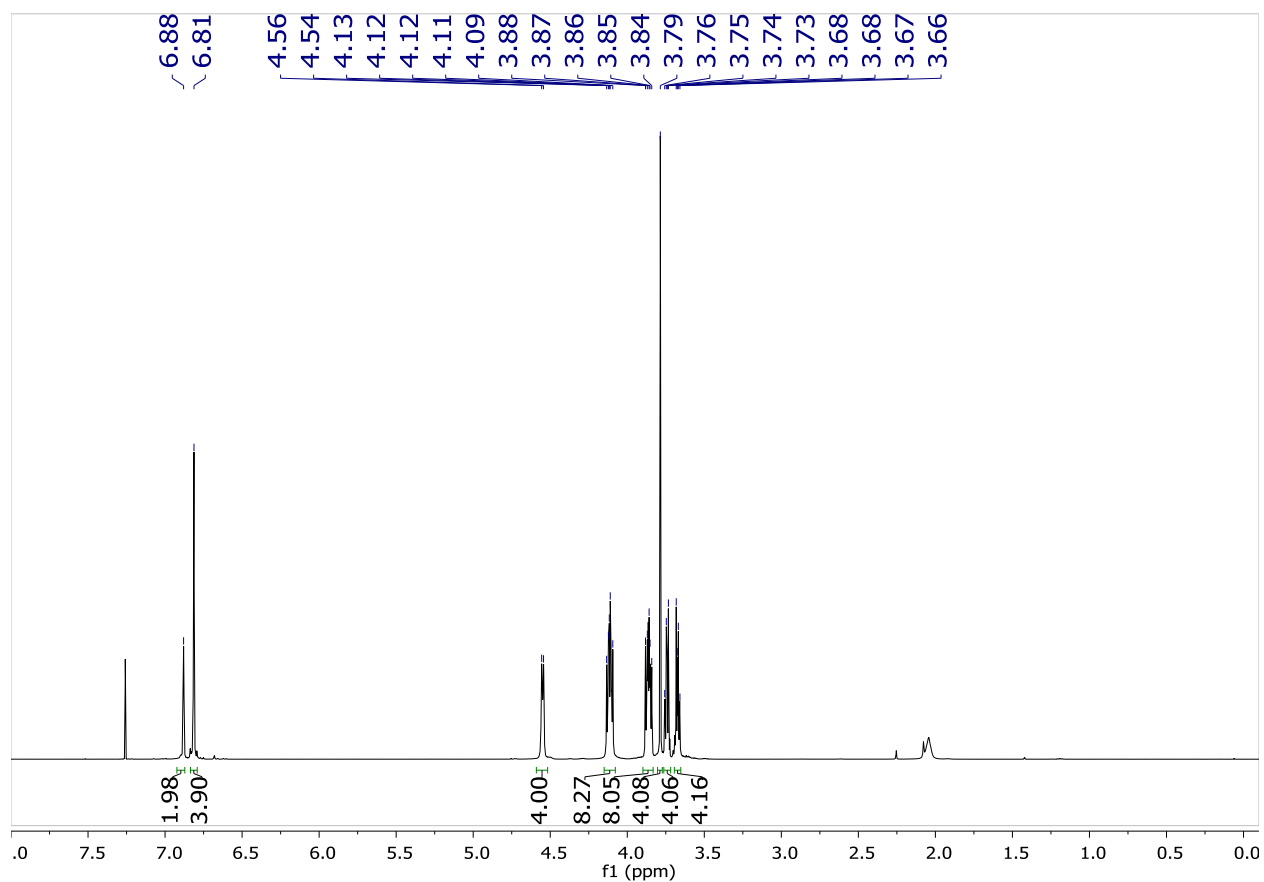

**Figure S4.**  $^1\text{H}$  NMR spectrum (400 MHz,  $\text{CDCl}_3$ , 23  $^\circ\text{C}$ ) of *cis*-bis(hydroxymethyl)dibenzo-27-crown-9-short (**7**):  $\delta$  6.88 (s, 2H), 6.81 (s, 4H), 4.55 (d,  $J$  = 5 Hz, 4H), 4.15 – 4.08 (m, 8H), 3.90 – 3.83 (m, 8H), 3.79 (s, 4H), 3.76 – 3.72 (m, 4H), 3.69 – 3.65 (m, 4H).

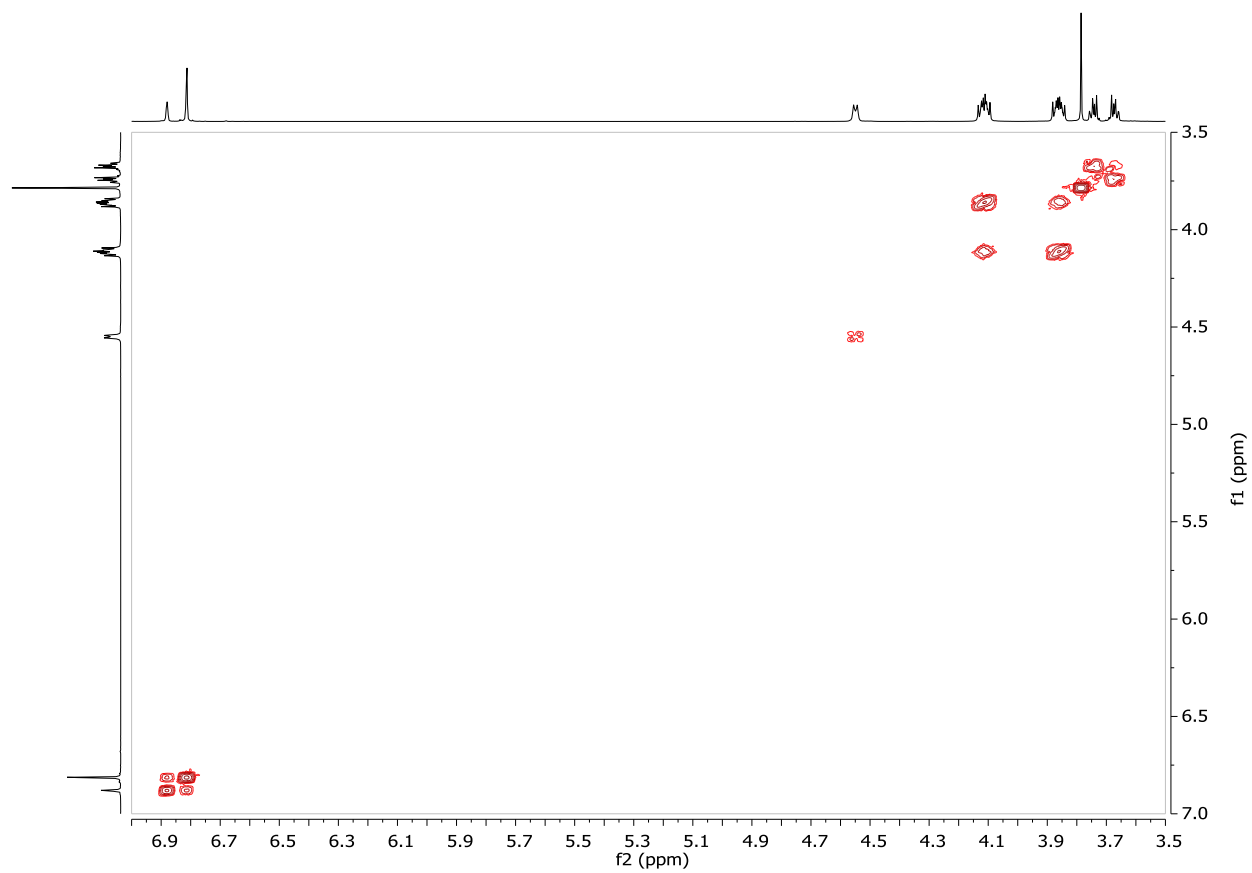

**Figure S5.** COSY NMR spectrum (400 MHz,  $\text{CDCl}_3$ , 23  $^{\circ}\text{C}$ ) of *cis*-bis(hydroxymethyl)dibenzo-27-crown-9-short (**7**).

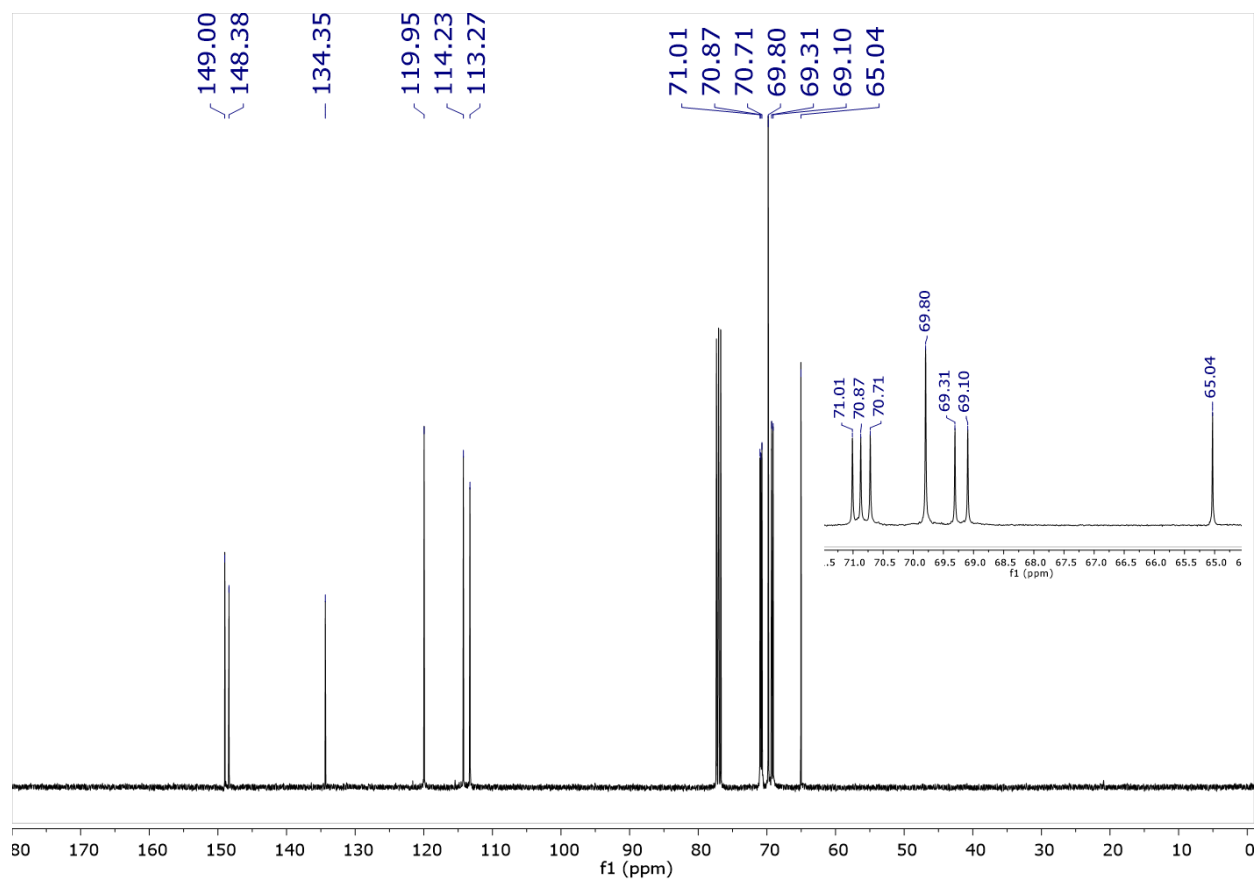

**Figure S6.**  $^{13}\text{C}$  NMR spectrum (101 MHz,  $\text{CDCl}_3$ , 23  $^\circ\text{C}$ ) of *cis*-bis(hydroxymethyl)dibenzo-27-crown-9-short (**7**):  $\delta$  149.00, 148.38, 134.35, 119.95, 114.23, 113.27, 71.01, 70.87, 70.71, 69.80, 69.31, 69.10, 65.04.



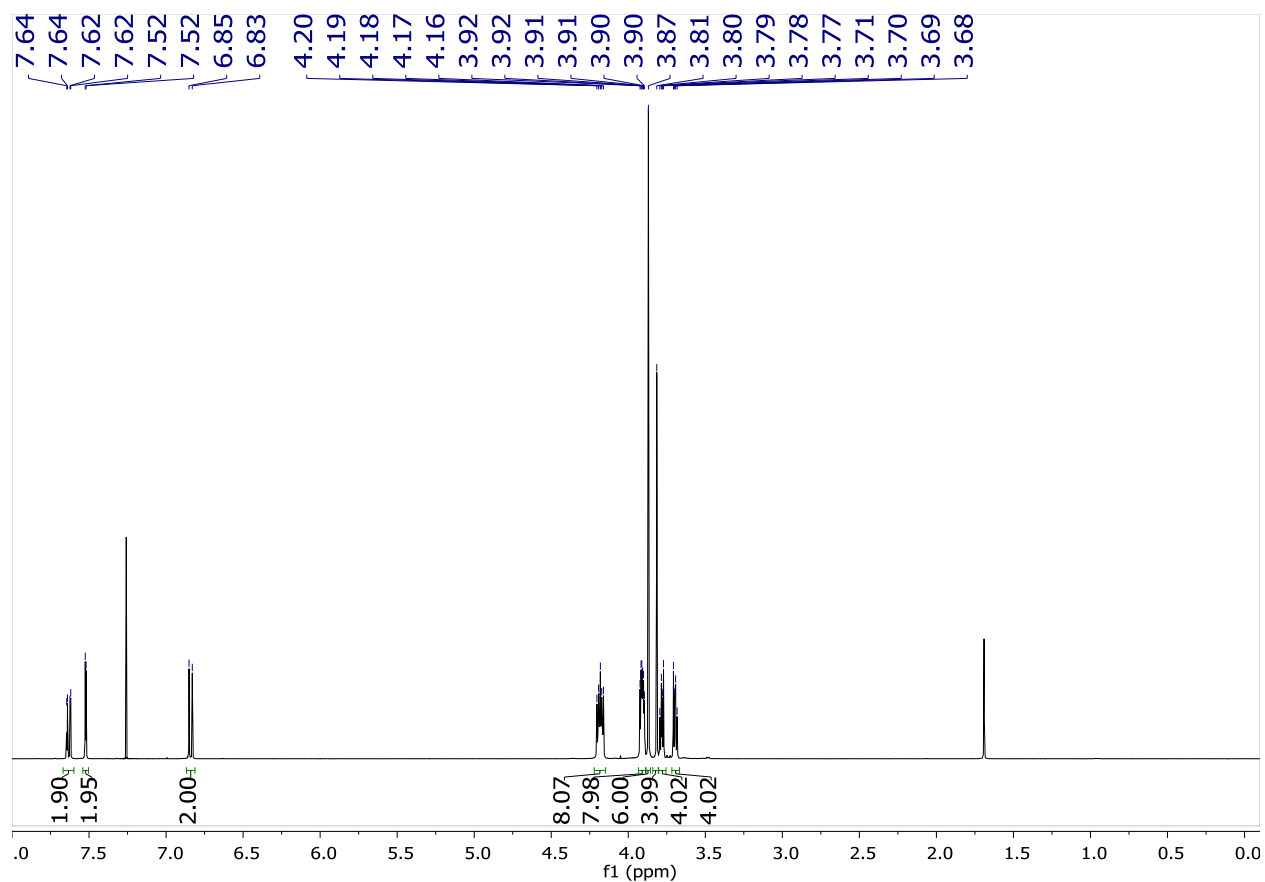

**Figure S7.**  $^1\text{H}$  NMR spectrum (400 MHz,  $\text{CDCl}_3$ , 23  $^\circ\text{C}$ ) of *cis*-di(carbomethoxy)dibenzo-27-crown-9-long (**9**):  $\delta$  7.63 (dd,  $J$  = 8, 2 Hz, 2H), 7.52 (d,  $J$  = 2 Hz, 2H), 6.84 (d,  $J$  = 8 Hz, 2H), 4.20 – 4.16 (m, 8H), 3.93 – 3.89 (m, 8H), 3.87 (s, 6H), 3.81 (s, 4H), 3.80 – 3.77 (m, 4H), 3.71 – 3.68 (m, 4H).

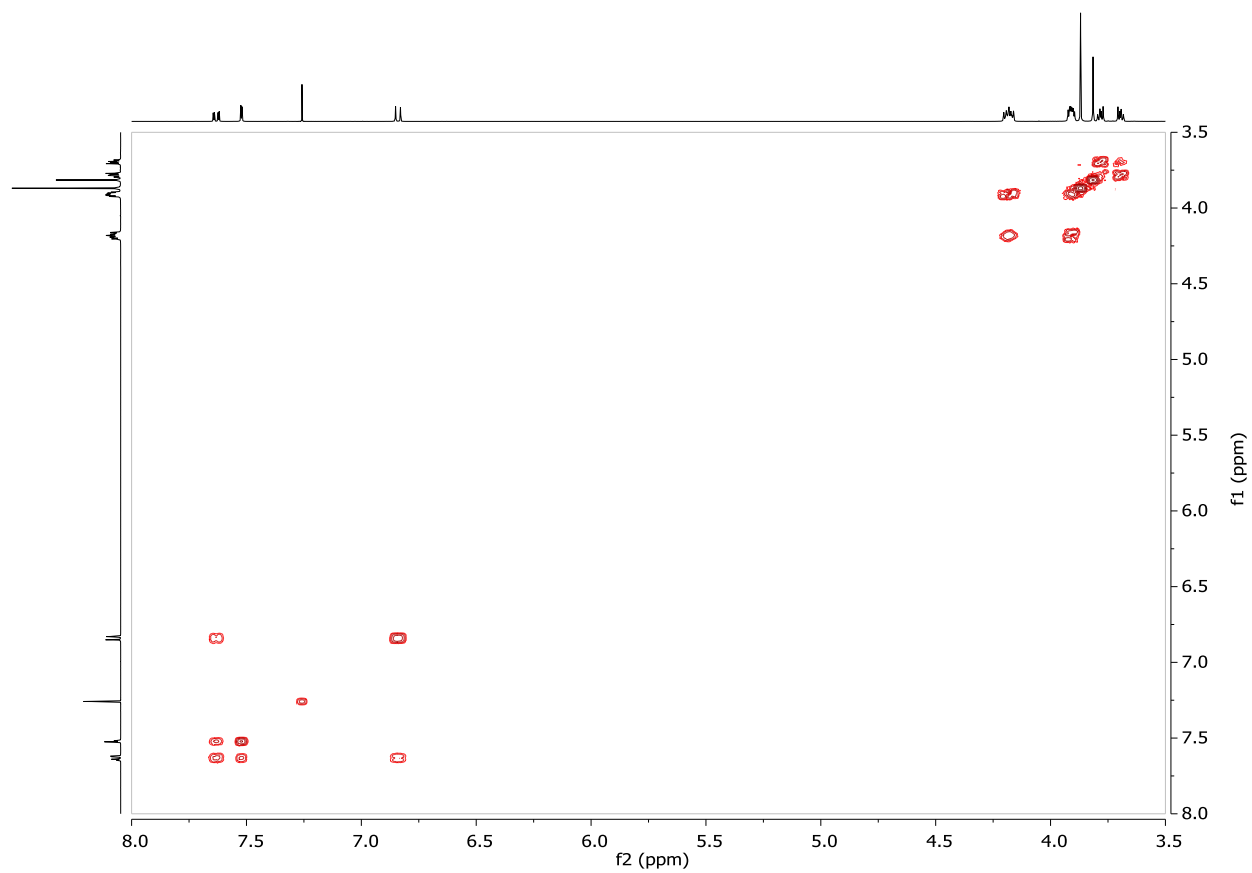

**Figure S8.** COSY NMR spectrum (400 MHz,  $\text{CDCl}_3$ , 23  $^{\circ}\text{C}$ ) of *cis*-di(carbomethoxy)dibenzo-27-crown-9-long (**9**).

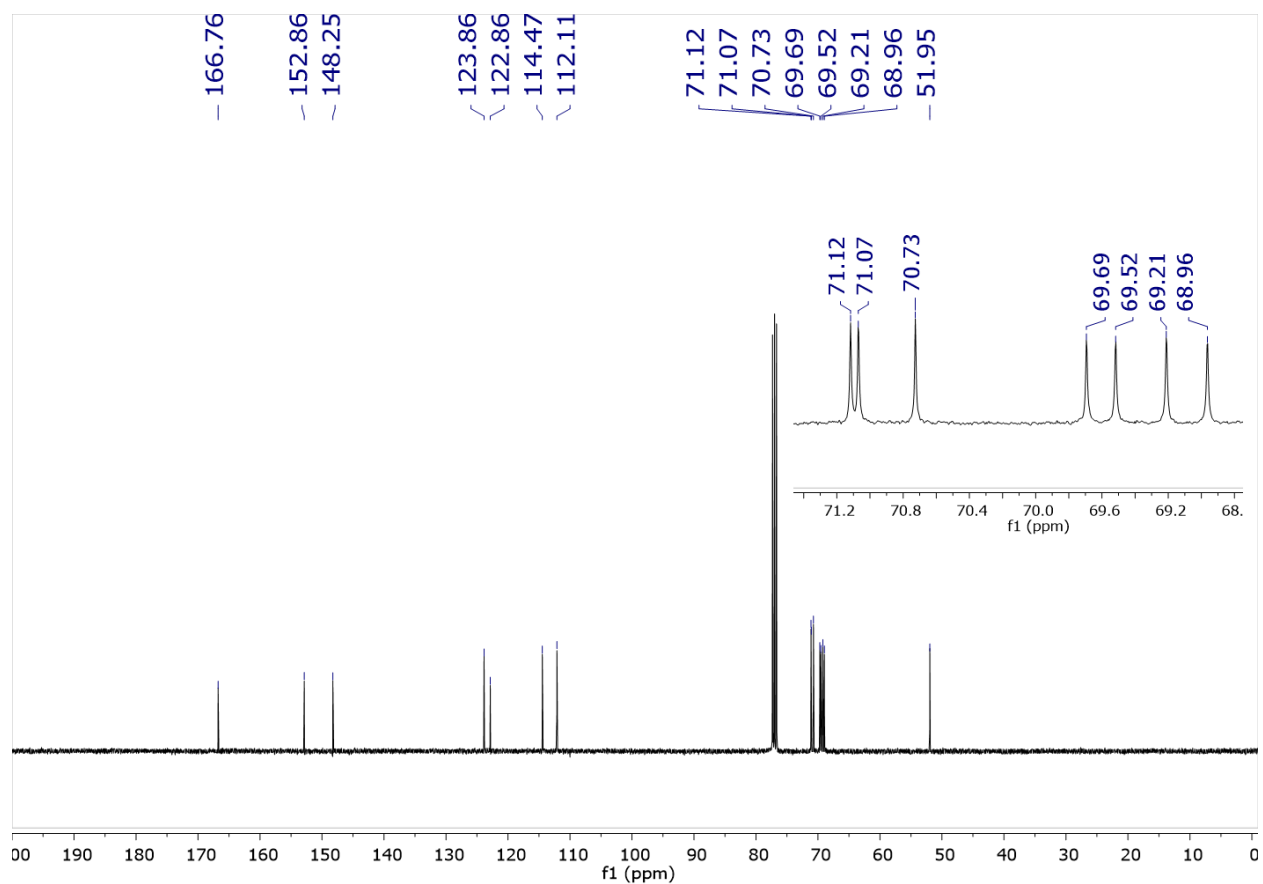

**Figure S9.**  $^{13}\text{C}$  NMR spectrum (101 MHz,  $\text{CDCl}_3$ , 23  $^\circ\text{C}$ ) of *cis*-di(carbomethoxy)dibenzo-27-crown-9-long (**9**):  $\delta$  166.76, 152.86, 148.25, 123.86, 122.86, 114.47, 112.11, 71.12, 71.07, 70.73, 69.69, 69.52, 69.21, 68.96, 51.95 (15 signals expected and 15 signals found).

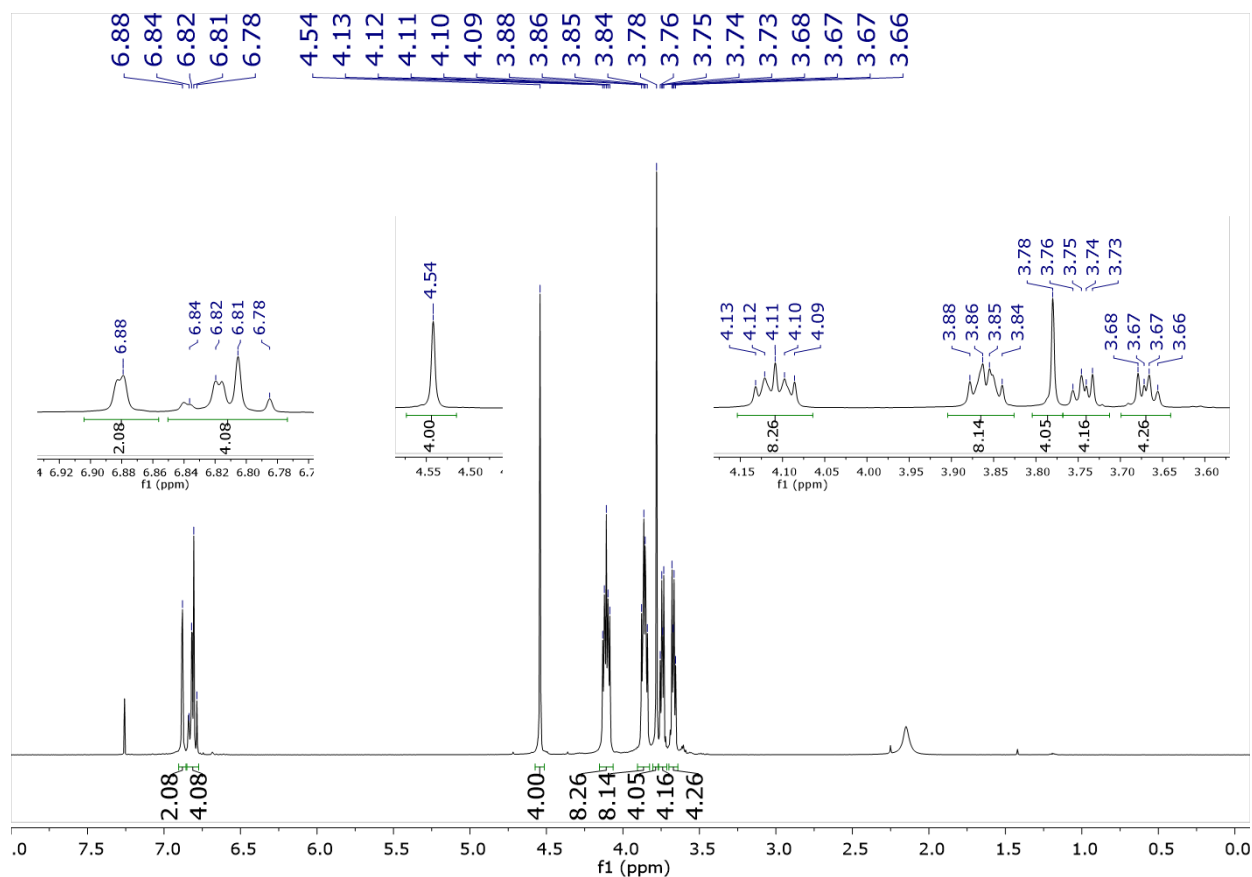

**Figure S10.**  $^1\text{H}$  NMR spectrum (400 MHz,  $\text{CDCl}_3$ , 23  $^\circ\text{C}$ ) of *cis*-bis(hydroxymethyl)dibenzo-27-crown-9-long (**10**):  $\delta$  6.88 (s, 2H), 6.85 – 6.77 (m, 4H), 4.54 (s, 4H), 4.13 – 4.09 (m, 8H), 3.90 – 3.83 (m, 8H), 3.78 (s, 4H), 3.76 – 3.73 (m, 4H), 3.68 – 3.66 (m, 4H).

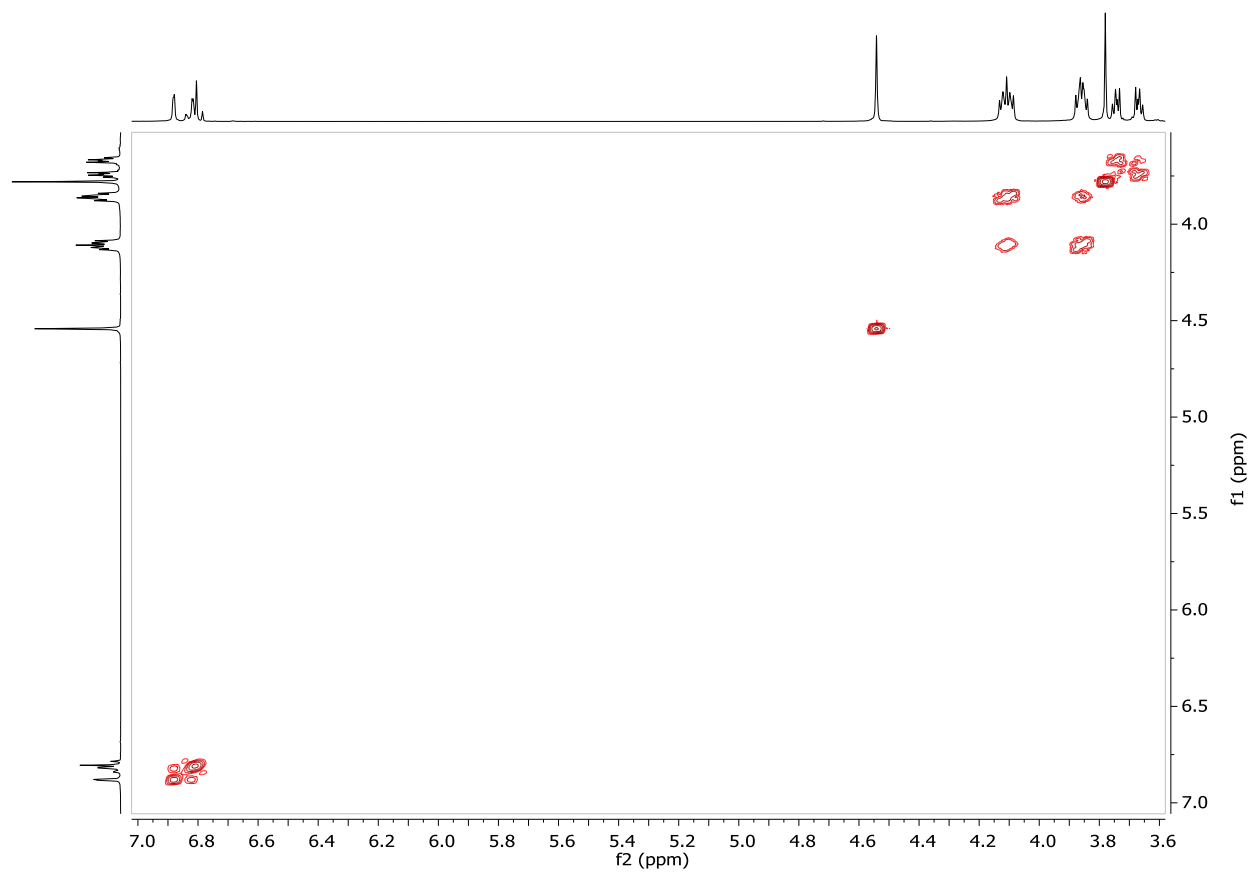

**Figure S11.** COSY NMR spectrum of of *cis*-bis(hydroxymethyl)dibenzo-27-crown-9-long (**10**).

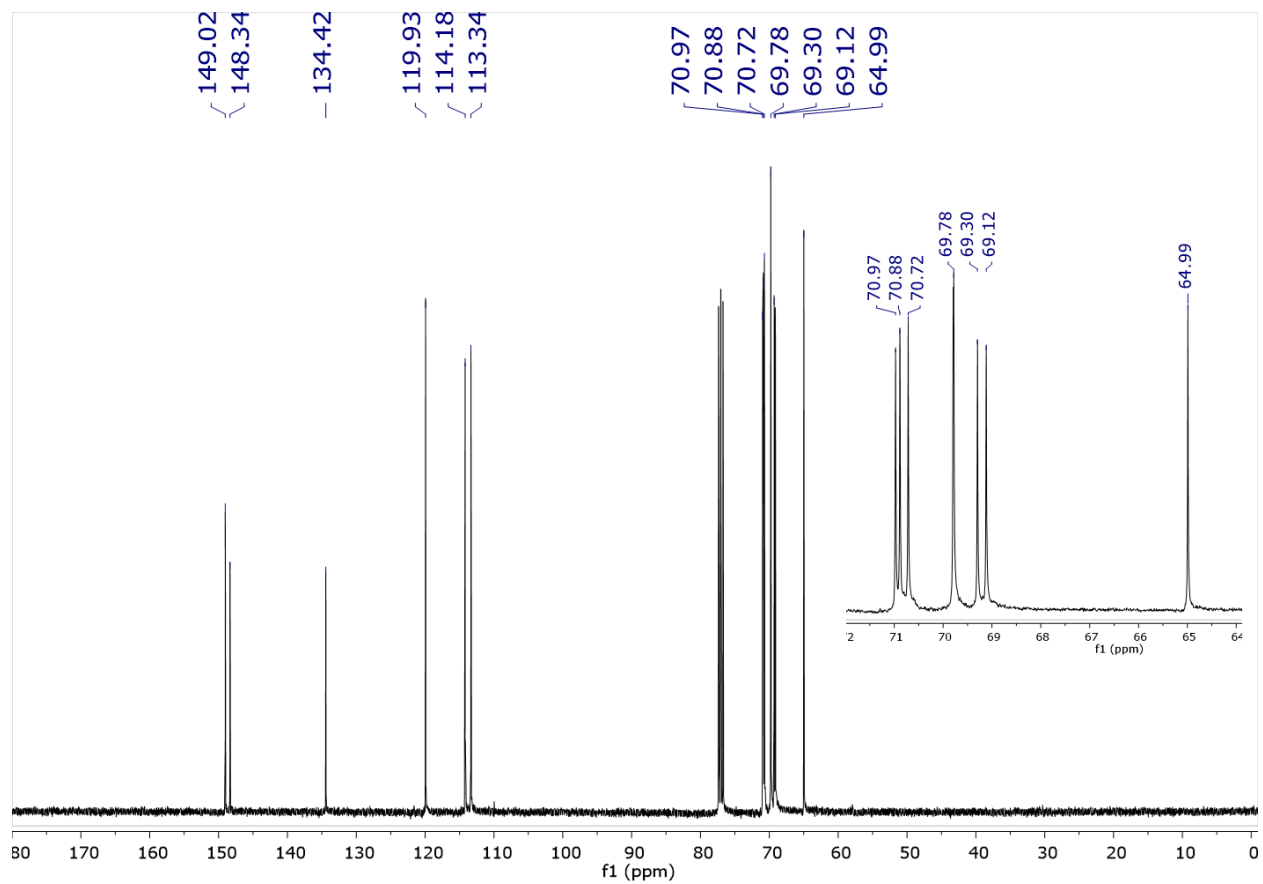

**Figure S12.**  $^{13}\text{C}$  NMR spectrum (101 MHz,  $\text{CDCl}_3$ , 23  $^{\circ}\text{C}$ ) of *cis*-bis(hydroxymethyl)dibenzo-27-crown-9-long (**10**):  $\delta$  149.02, 148.34, 134.42, 119.93, 114.18, 113.34, 70.97, 70.88, 70.72, 69.78, 69.30, 69.12, 64.99 (13 signals expected and 13 signals found).

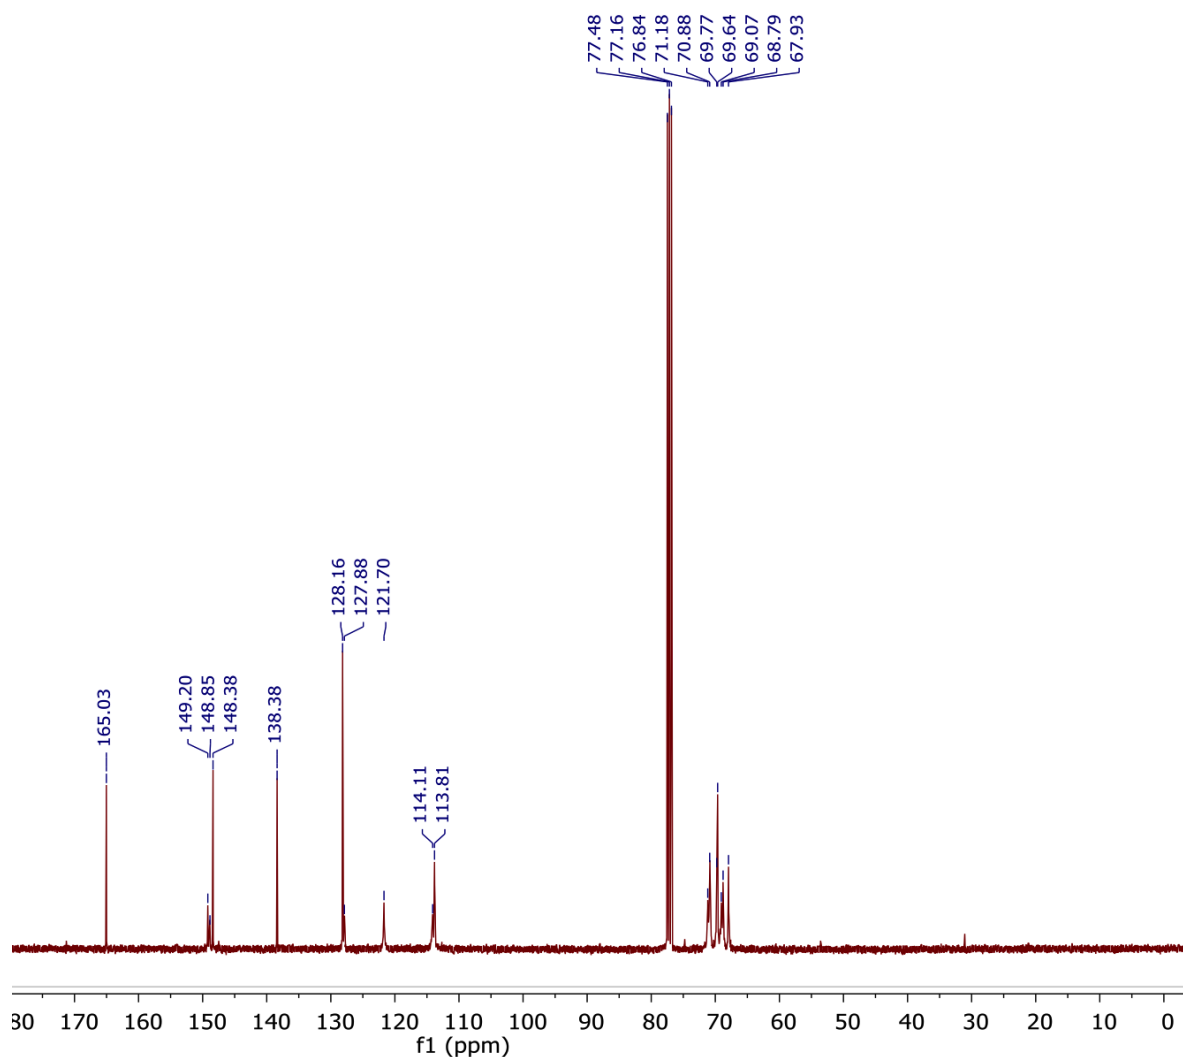

**Figure S13.**  $^{13}\text{C}$  NMR spectrum (101 MHz,  $\text{CDCl}_3$ , 23  $^\circ\text{C}$ ) of *cis*-dibenzo-27-crown-9-short pyridyl cryptand **3**:  $\delta$  (ppm): 165.0, 149.2, 148.8, 148.3, 138.3, 128.1, 127.8, 121.7, 114.1, 113.8, 71.1, 70.8, 69.7, 69.6, 69.0, 68.7, 67.9 (18 peaks expected and 17 peaks found).

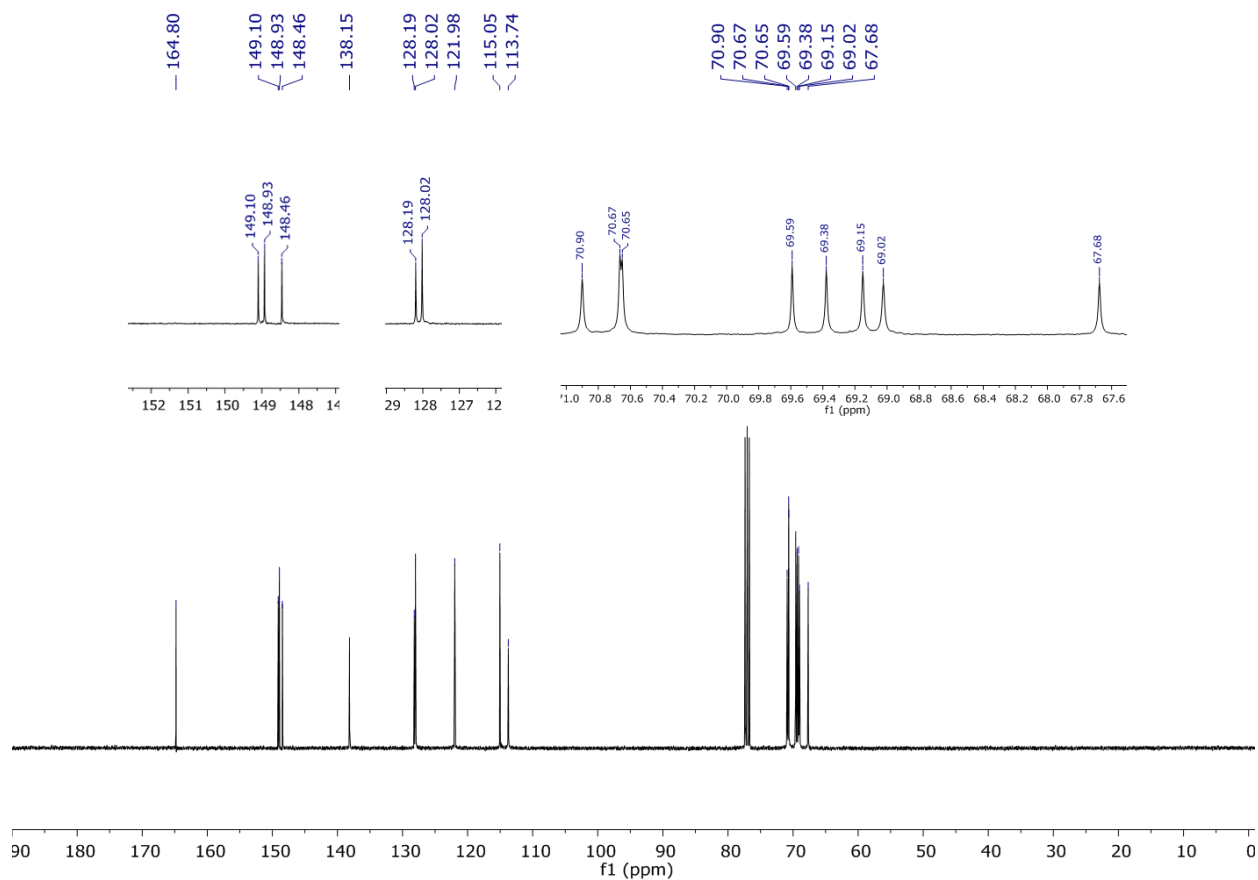

**Figure S14.**  $^{13}\text{C}$  NMR spectrum (101 MHz,  $\text{CDCl}_3$ , 23  $^\circ\text{C}$ ) of *cis*-dibenzo-27-crown-9-long pyridyl cryptand **4**:  $\delta$  (ppm): 164.8, 149.1, 148.9, 148.5, 138.2, 128.2, 128.0, 122.0, 115.0, 113.7, 70.9, 70.7, 70.6, 69.6, 69.4, 69.2, 69.0, 67.7 (18 signals expected and 18 found).



## Crystallographic Data for the complex 3•DQ(PF<sub>6</sub>)<sub>2</sub>.

### Experimental

A yellow rod (0.089 x 0.148 x 0.376 mm<sup>3</sup>) was centered on the goniometer of a Rigaku Oxford Diffraction Gemini S Ultra diffractometer operating with MoK $\alpha$  radiation. The data collection routine, unit cell refinement, and data processing were carried out with the program CrysAlisPro.<sup>S1</sup> The diffraction pattern showed evidence of a minor satellite crystal (<10%). Processing and refining as a twin did not improve the refinement, so the sample was treated as a single crystal. The Laue symmetry and systematic absences were consistent with the orthorhombic space group *Pbca*. The structure was solved using SHELXS-2014<sup>S2</sup> and refined using SHELXL-2014<sup>S2</sup> via Olex2.<sup>S3</sup> The final refinement model involved anisotropic displacement parameters for non-hydrogen atoms and a riding model for all hydrogen atoms. A 2-position disorder model was used for one of the polyether arms of the cryptand and for the diquat. Relative occupancies refined to 0.615(15) / 0.385(15) and 0.732(14) / 0.268(14), respectively. Disordered solvent at Wyckoff positions 8c (coordinates 0.009 0.237 0.674; point symmetry 1) could not be modeled effectively; therefore the solvent mask feature of OLEX2 was used. A total of 34.3 e<sup>-</sup> (approx. 1 acetone) was subtracted from a void of 129.9 Å<sup>3</sup> (corresponding to 274.6 e<sup>-</sup> subtracted from 1039.4 Å<sup>3</sup> total void space per unit cell).

**Table 1.** Crystal data and structure refinement for **3•DQ(PF<sub>6</sub>)<sub>2</sub>**.

|                                   |                                                                                                                                                                       |
|-----------------------------------|-----------------------------------------------------------------------------------------------------------------------------------------------------------------------|
| Identification code               | AMP006                                                                                                                                                                |
| Empirical formula                 | [C <sub>35</sub> H <sub>41</sub> NO <sub>13</sub> • C <sub>12</sub> H <sub>12</sub> N <sub>2</sub> ][PF <sub>6</sub> ] <sub>2</sub> • C <sub>3</sub> H <sub>6</sub> O |
| Formula weight                    | 1215.94                                                                                                                                                               |
| Temperature                       | 100.05(10) K                                                                                                                                                          |
| Wavelength                        | 0.71073 Å                                                                                                                                                             |
| Crystal system                    | Orthorhombic                                                                                                                                                          |
| Space group                       | <i>Pbca</i>                                                                                                                                                           |
| Unit cell dimensions              | $a = 20.9890(5)$ Å $\alpha = 90^\circ$ .<br>$b = 21.5927(6)$ Å $\beta = 90^\circ$ .<br>$c = 23.4837(5)$ Å $\gamma = 90^\circ$ .                                       |
| Volume                            | 10643.0(5) Å <sup>3</sup>                                                                                                                                             |
| Z                                 | 8                                                                                                                                                                     |
| Density (calculated)              | 1.518 Mg/m <sup>3</sup>                                                                                                                                               |
| Absorption coefficient            | 0.193 mm <sup>-1</sup>                                                                                                                                                |
| F(000)                            | 5040                                                                                                                                                                  |
| Crystal size                      | 0.376 x 0.148 x 0.089 mm <sup>3</sup>                                                                                                                                 |
| Theta range for data collection   | 4.069 to 26.371°.                                                                                                                                                     |
| Index ranges                      | -26 ≤ h ≤ 22, -23 ≤ k ≤ 26, -29 ≤ l ≤ 29                                                                                                                              |
| Reflections collected             | 74416                                                                                                                                                                 |
| Independent reflections           | 10831 [R(int) = 0.1081]                                                                                                                                               |
| Completeness to theta = 25.242°   | 99.5 %                                                                                                                                                                |
| Absorption correction             | Gaussian                                                                                                                                                              |
| Max. and min. transmission        | 0.984 and 0.946                                                                                                                                                       |
| Refinement method                 | Full-matrix least-squares on F <sup>2</sup>                                                                                                                           |
| Data / restraints / parameters    | 10831 / 225 / 741                                                                                                                                                     |
| Goodness-of-fit on F <sup>2</sup> | 1.212                                                                                                                                                                 |
| Final R indices [I > 2σ(I)]       | R1 = 0.1245, wR2 = 0.3188                                                                                                                                             |
| R indices (all data)              | R1 = 0.1744, wR2 = 0.3567                                                                                                                                             |
| Extinction coefficient            | n/a                                                                                                                                                                   |
| Largest diff. peak and hole       | 1.701 and -0.508 e.Å <sup>-3</sup>                                                                                                                                    |

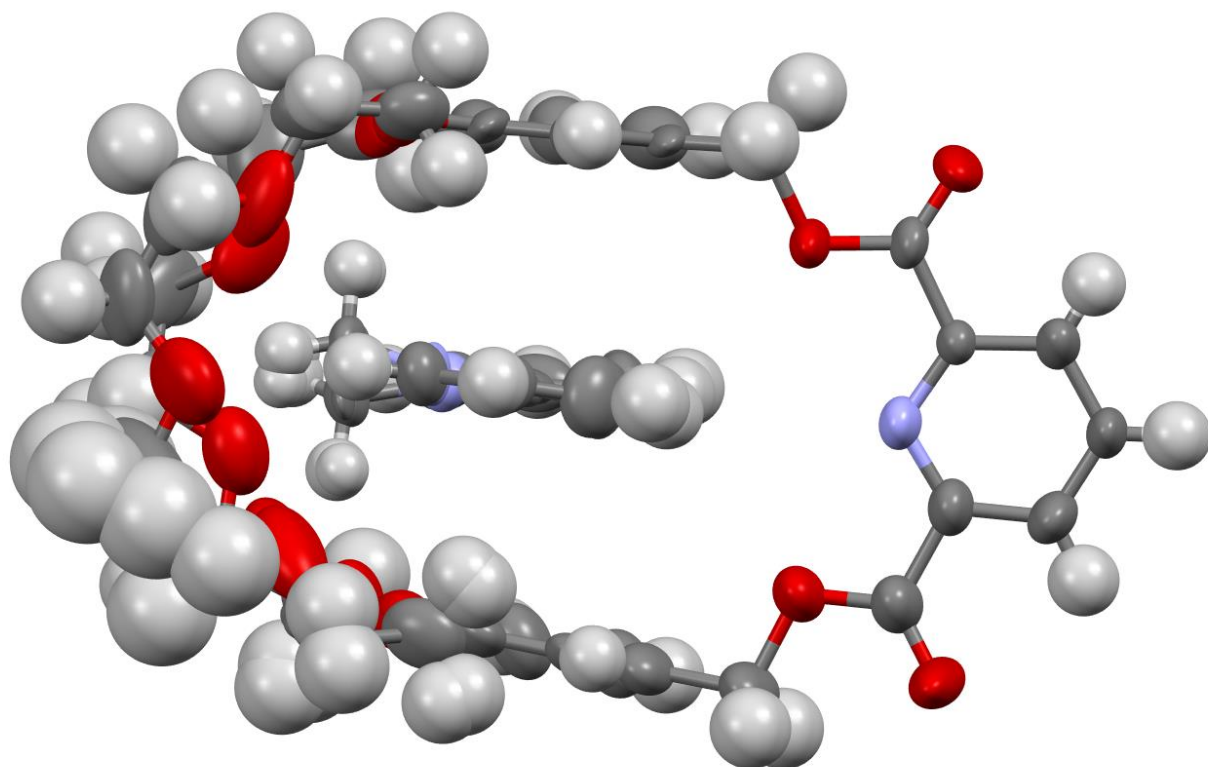

**Figure S15.** Thermal ellipsoid representation of **3-DQ(PF<sub>6</sub>)<sub>2</sub>** at the 90% confidence level.

## REFERENCES

- S1. CrysAlisPro Software System, v1.171.38.43, Rigaku Oxford Diffraction, **2017**, Rigaku Corporation, Oxford, UK.
- S2. Sheldrick, G. M. "A short history of SHELX." *Acta Cryst.* **2008**, *A64*, 112-122.
- S3. Dolomanov, O.V.; Bourhis, L. J.; Gildea, R. J.; Howard, J. A. K.; Puschmann, H. *J. Appl. Cryst.* **2009**, *42*, 339–341.
